# Supplementary material for: A RAPGEF6 variant constitutes a major risk factor for laryngeal paralysis in dogs
Source: PLoS Genet. 2019 Oct 24;15(10):e1008416. doi: 10.1371/journal.pgen.1008416 (PMC6812752; doi:10.1371/journal.pgen.1008416)
Supplement: S4 Table — (XLSX) [file pgen.1008416.s005.xlsx]

## Sheet: Sheet1
S4 Table. Structural variants in the LP affected Miniature Bull Terrier. These variants were identified in the critical interval (chr11:19,028,794-20,387,962; CanFam 3.1) by visual inspection of read alignments in IGV.
Chromosome	Position	Variant	Genotype (by visual inspection of short read alignments in IGV)	Gene	Location within gene	Identified in the automated variant calling	Genotype (by automated variant calling, derived from vcf-file)	Absent from control genomes
11	19251633	INS (insertion with 15 nt duplication flanking the insertion site)	ins/ins	intergenic		no		no
11	19392148	INS (insertion with 15 nt duplication flanking the insertion site)	ins/ins	intergenic		yes	./.	no
11	19416800	INS (insertion with 3 nt duplication flanking the insertion site)	ins/ins	intergenic		yes	wt/wt	no
11	19841331	INS (insertion with 15 nt duplication flanking the insertion site)	ins/ins	RAPGEF6	exon 15	no		yes
11	19849921	DEL (deletion of a ~200 bp SINE element)	del/del	RAPGEF6	intron 13	no		no
